# Supplementary material for: Grandiflodines A and B, two novel diterpenoid alkaloids from Delphinium grandiflorum
Source: Royal Society of Chemistry journal article supplement (doi:10.1039/c7ra02869e), 2017-01-01
Supplement: c7ra02869e1.pdf [file c7ra02869e1.pdf]

**Grandiflodines A and B, two novel diterpenoid alkaloids from**  
*Delphinium grandiflorum*

Neng-Hua Chen,<sup>ab</sup> Yu-Bo Zhang,<sup>ab</sup> Wen Li,<sup>ab</sup> Pan Li,<sup>ab</sup> Li-Feng Chen,<sup>ab</sup> Yao-Lan Li,<sup>ab</sup>

Guo-Qiang Li,<sup>c\*</sup> and Guo-Cai Wang<sup>ab\*</sup>

<sup>a</sup> Institute of Traditional Chinese Medicine & Natural Products, College of Pharmacy,  
Jinan University, Guangzhou 510632, P. R. China

<sup>b</sup> Guangdong Province Key Laboratory of Pharmacodynamic Constituents of TCM and New  
Drugs Research, Jinan University, Guangzhou 510632, P. R. China

<sup>c</sup> Foshan University, Foshan, 528000, China

\* Corresponding authors:

E-mail: twangguocai@jnu.edu.cn (G. C. Wang), liguoqiang@jnu.edu.cn (G. Q. Li)

## Contents

|                                                                                                                       |    |
|-----------------------------------------------------------------------------------------------------------------------|----|
| Figure S1. The HR-ESI-MS of compound <b>1</b> .....                                                                   | 1  |
| Figure S2. The UV of compound <b>1</b> in MeOH .....                                                                  | 1  |
| Figure S3. The IR (KBr disc) of compound <b>1</b> .....                                                               | 2  |
| Figure S4. The <sup>1</sup> H NMR spectrum of compound <b>1</b> in DMSO- <i>d</i> <sub>6</sub> .....                  | 2  |
| Figure S5. The <sup>13</sup> C NMR spectrum of compound <b>1</b> in DMSO- <i>d</i> <sub>6</sub> .....                 | 3  |
| Figure S6. The DEPT-135 NMR spectrum of compound <b>1</b> in DMSO- <i>d</i> <sub>6</sub> .....                        | 3  |
| Figure S7. The <sup>1</sup> H- <sup>1</sup> H COSY spectrum of compound <b>1</b> in DMSO- <i>d</i> <sub>6</sub> ..... | 4  |
| Figure S8. The HSQC spectrum of compound <b>1</b> in DMSO- <i>d</i> <sub>6</sub> .....                                | 4  |
| Figure S9. The HMBC spectrum of compound <b>1</b> in DMSO- <i>d</i> <sub>6</sub> .....                                | 5  |
| Figure S10. The NOESY spectrum of compound <b>1</b> in DMSO- <i>d</i> <sub>6</sub> .....                              | 5  |
| Figure S11. The HR-ESI-MS of compound <b>2</b> .....                                                                  | 6  |
| Figure S12. The UV of compound <b>2</b> in MeOH .....                                                                 | 6  |
| Figure S13. The IR (KBr disc) of compound <b>2</b> .....                                                              | 7  |
| Figure S14. The <sup>1</sup> H NMR spectrum of compound <b>2</b> in CDCl <sub>3</sub> .....                           | 7  |
| Figure S15. The <sup>13</sup> C NMR spectrum of compound <b>2</b> in CDCl <sub>3</sub> .....                          | 8  |
| Figure S16. The DEPT-135 NMR spectrum of compound <b>2</b> in CDCl <sub>3</sub> .....                                 | 8  |
| Figure S17. The <sup>1</sup> H- <sup>1</sup> H COSY spectrum of compound <b>2</b> in CDCl <sub>3</sub> .....          | 9  |
| Figure S18. The HSQC NMR spectrum of compound <b>2</b> in CDCl <sub>3</sub> .....                                     | 9  |
| Figure S19. The HMBC spectrum of compound <b>2</b> in CDCl <sub>3</sub> .....                                         | 10 |
| Figure S20. The NOESY spectrum of compound <b>2</b> in CDCl <sub>3</sub> .....                                        | 10 |

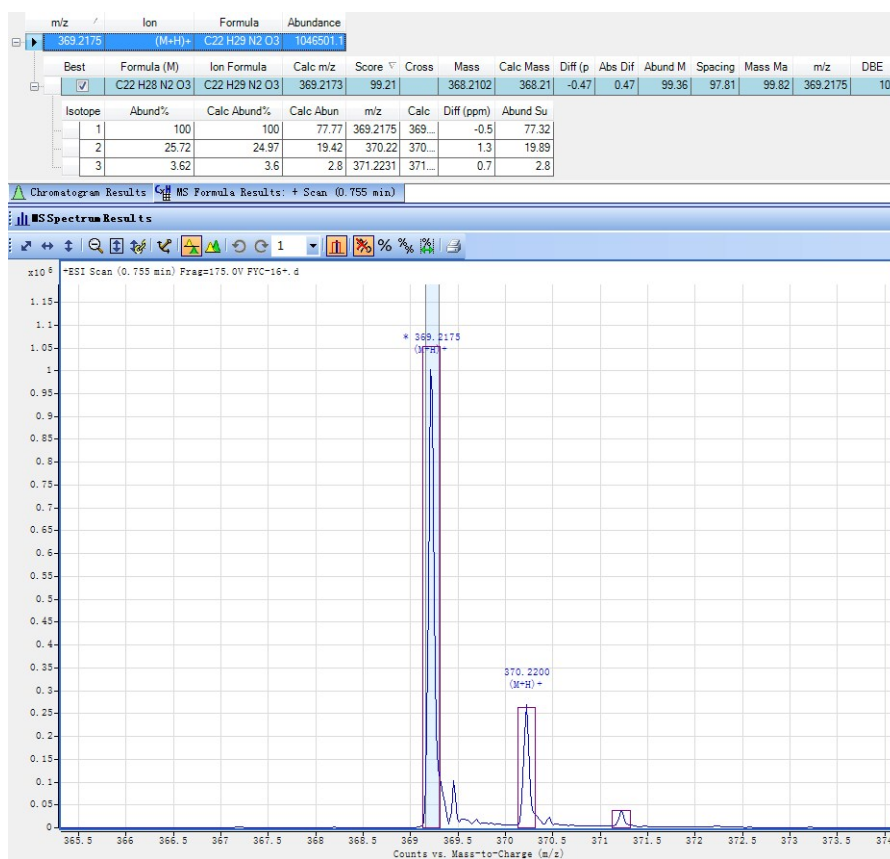

**Figure S1. The HR-ESI-MS of compound 1**

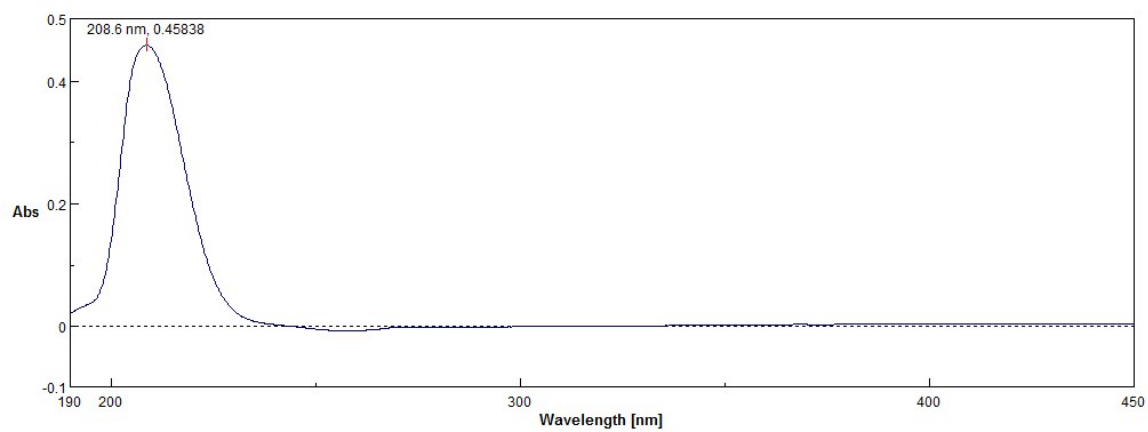

**Figure S2. The UV of compound 1 in MeOH**

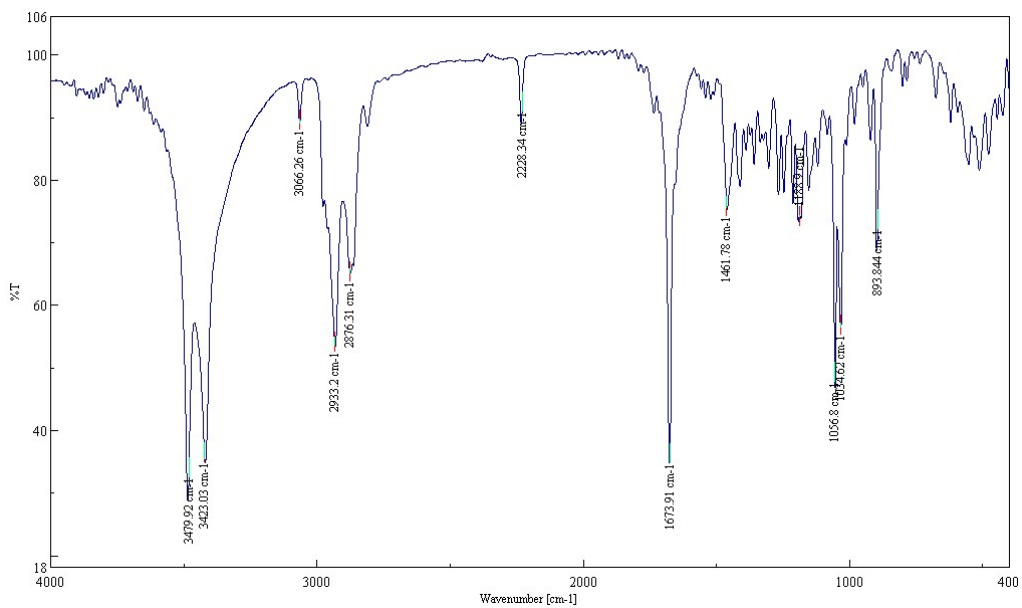

Figure S3. The IR (KBr disc) of compound 1

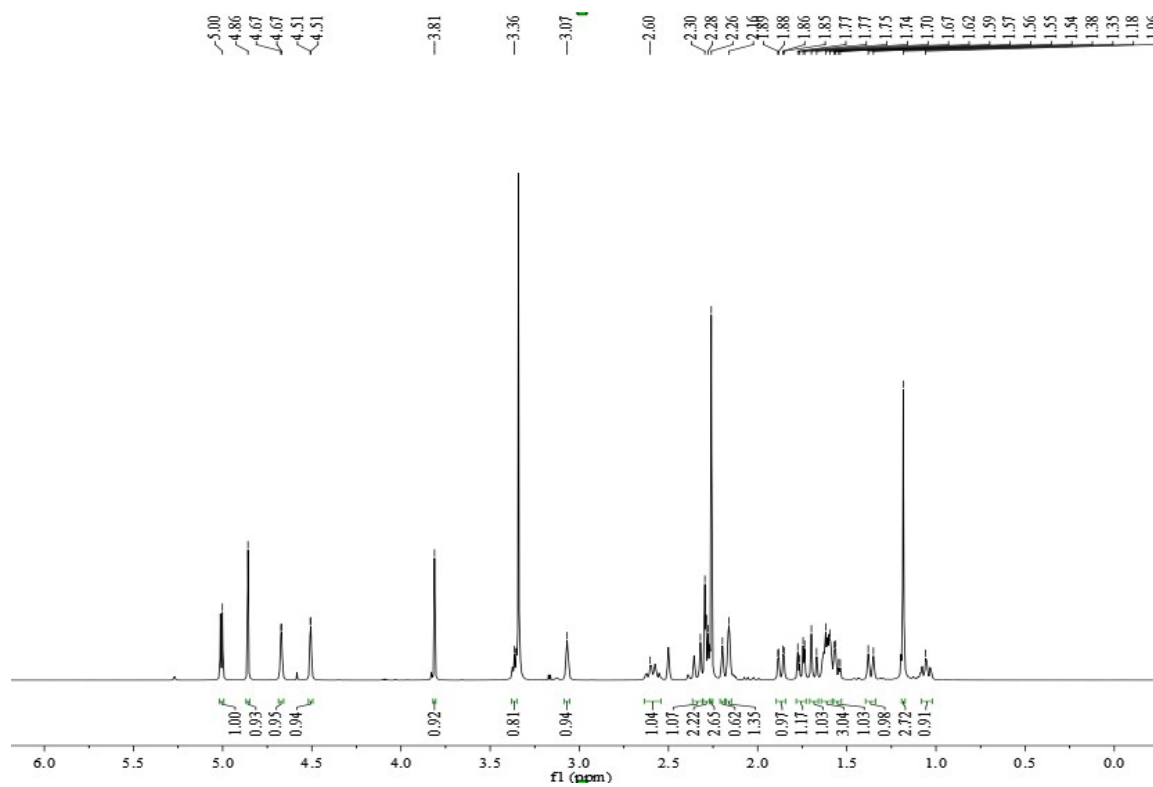

Figure S4. The <sup>1</sup>H NMR spectrum of compound 1 in DMSO-*d*<sub>6</sub>

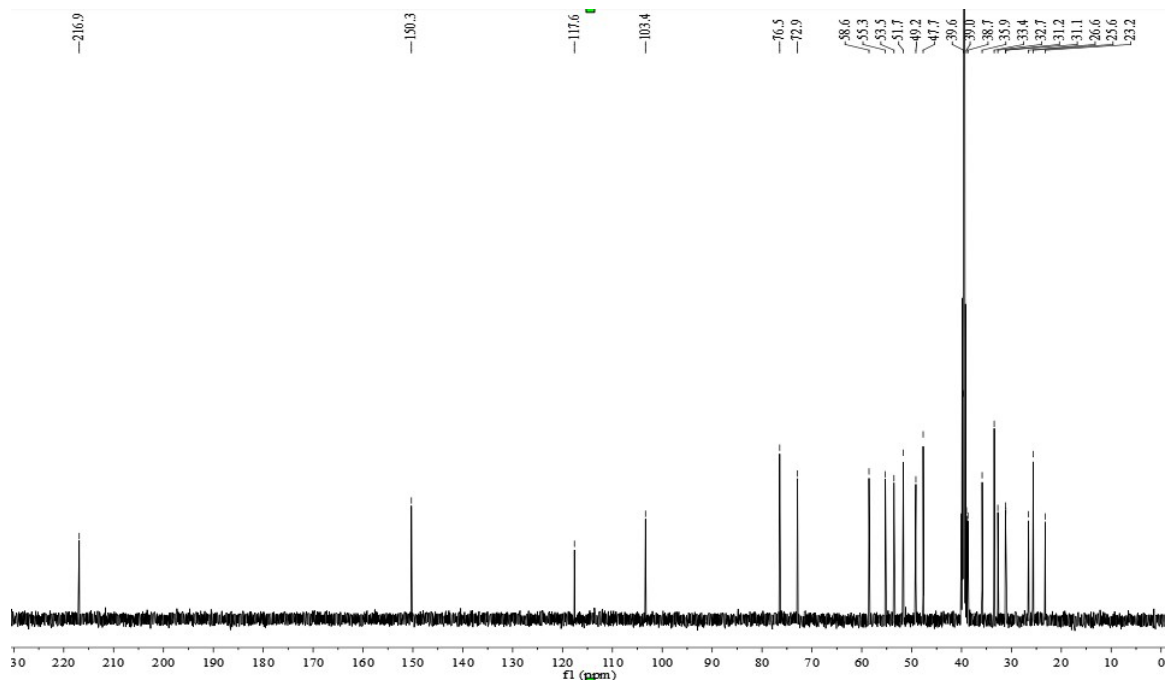

Figure S5. The  $^{13}\text{C}$  NMR spectrum of compound 1 in  $\text{DMSO-}d_6$

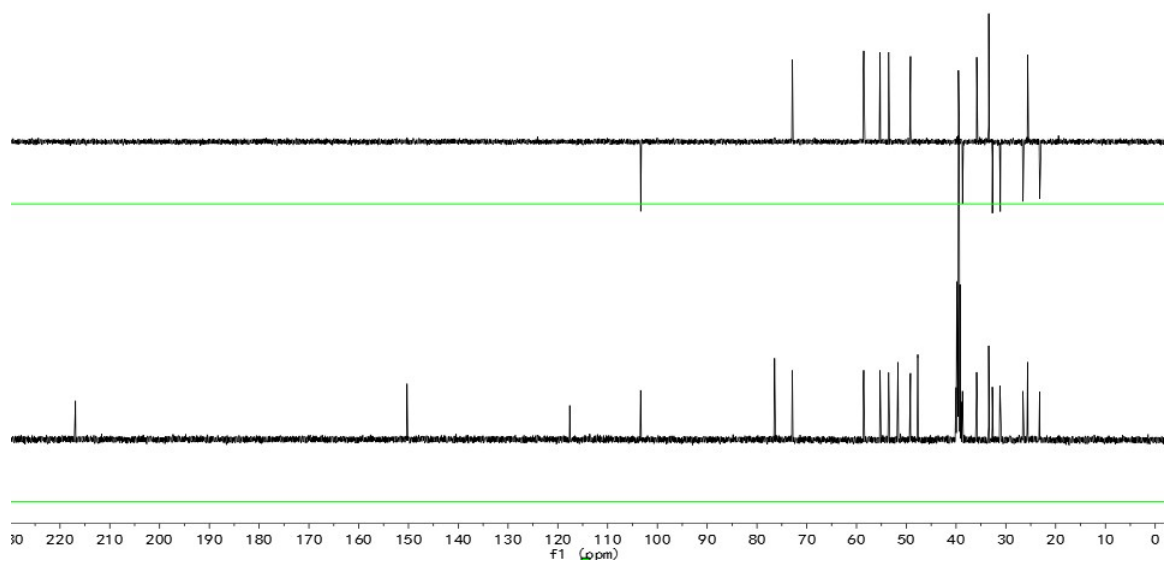

Figure S6. The DEPT-135 NMR spectrum of compound 1 in  $\text{DMSO-}d_6$

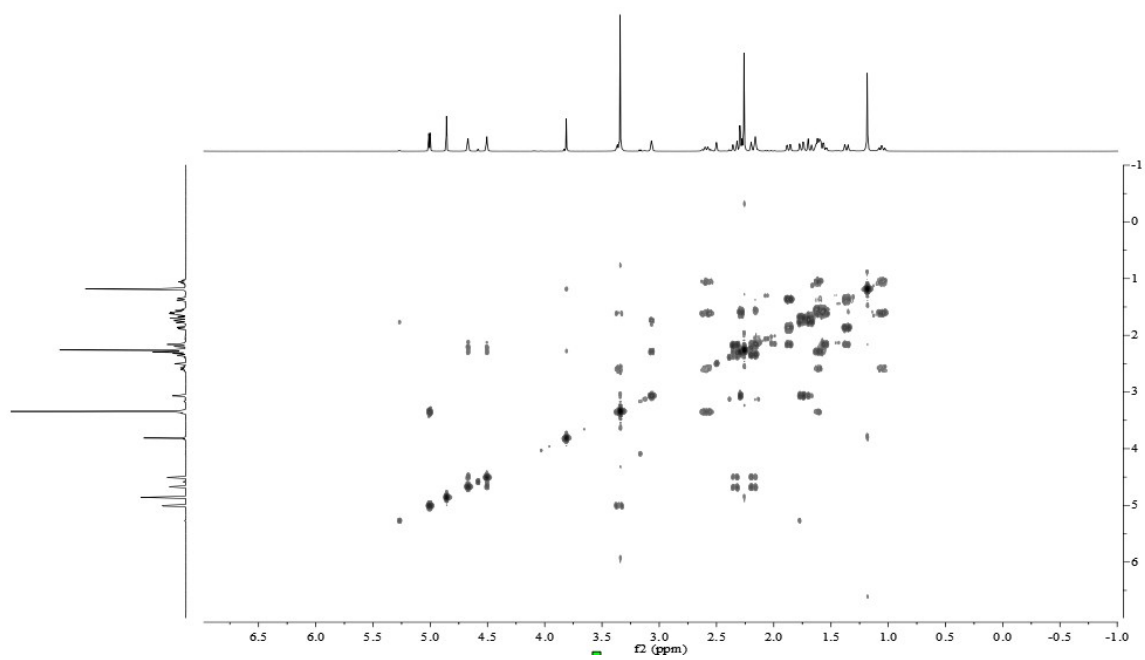

Figure S7. The  $^1\text{H}$ - $^1\text{H}$  COSY spectrum of compound 1 in  $\text{DMSO-}d_6$

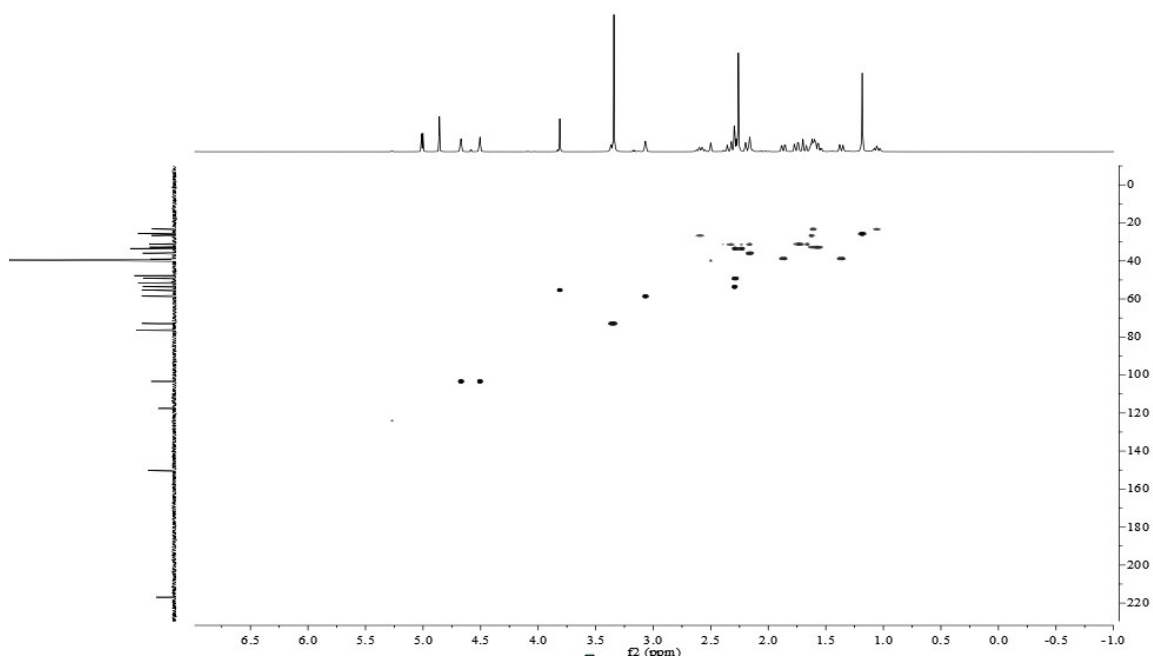

Figure S8. The HSQC spectrum of compound 1 in  $\text{DMSO-}d_6$

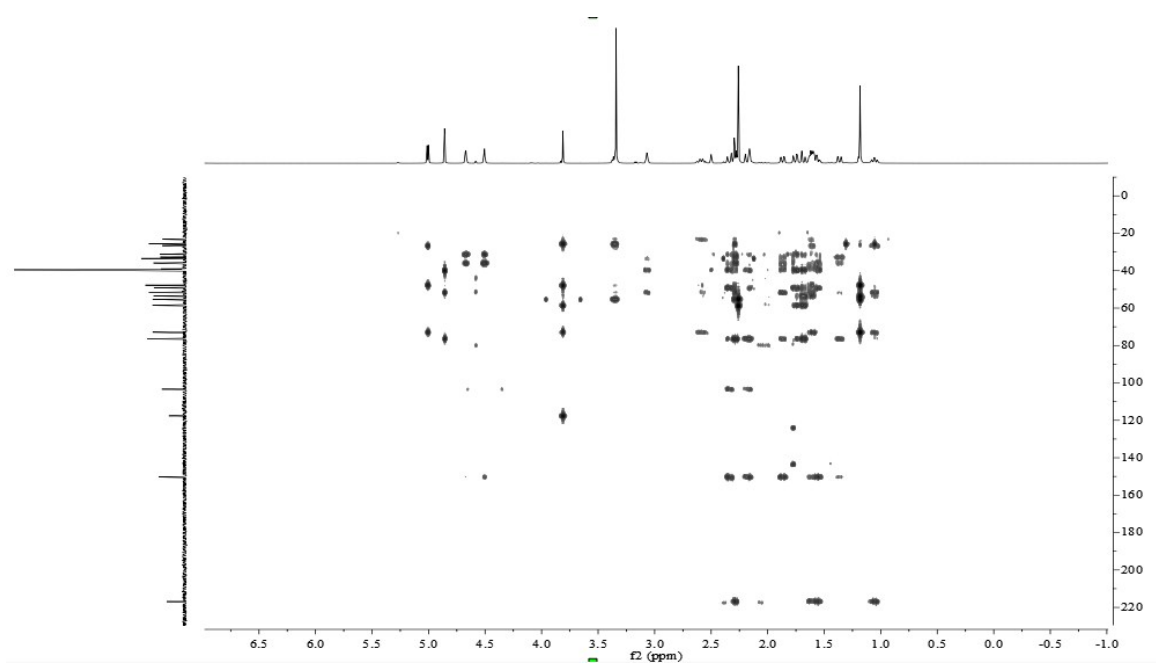

**Figure S9.** The HMBC spectrum of compound 1 in DMSO- $d_6$

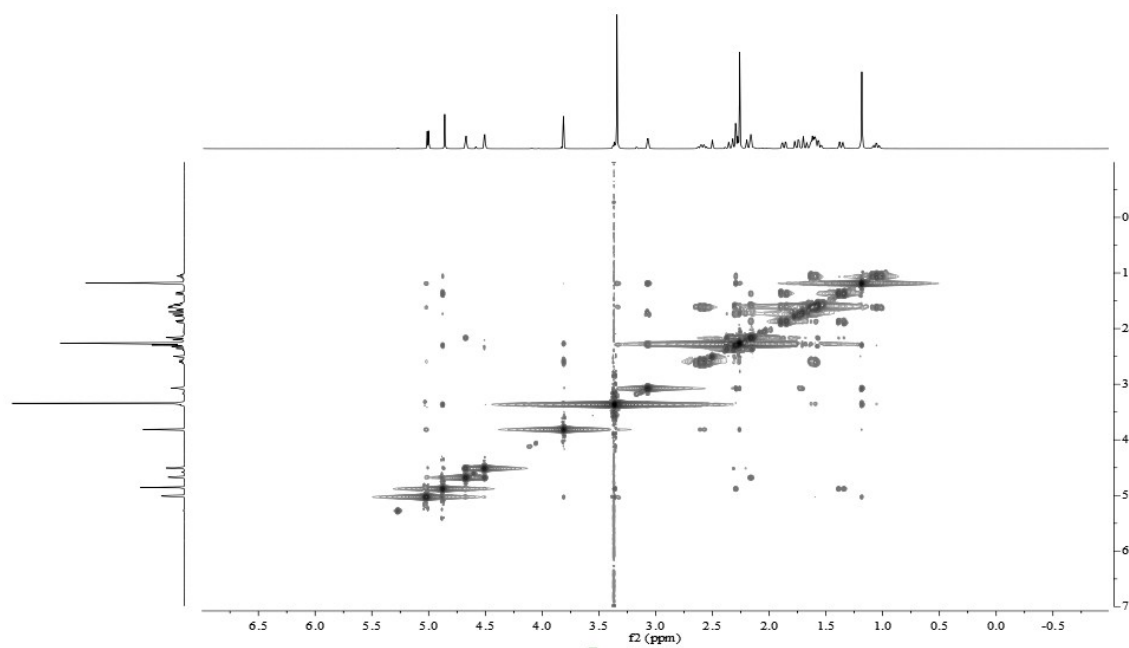

**Figure S10.** The NOESY spectrum of compound 1 in DMSO- $d_6$

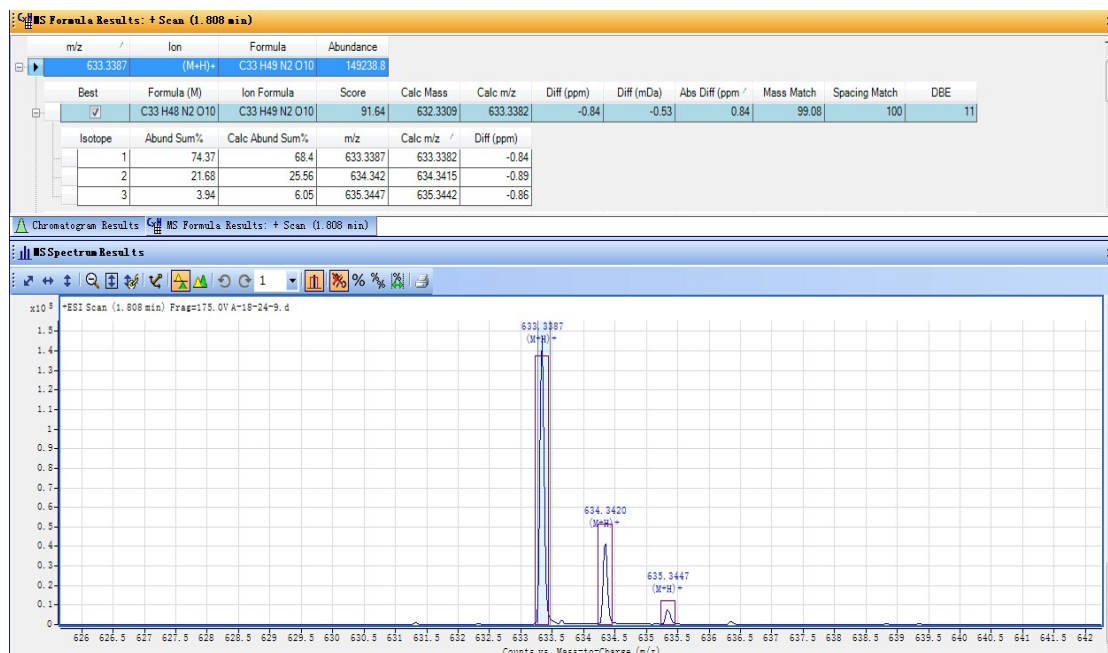

Figure S11. The HR-ESI-MS of compound 2

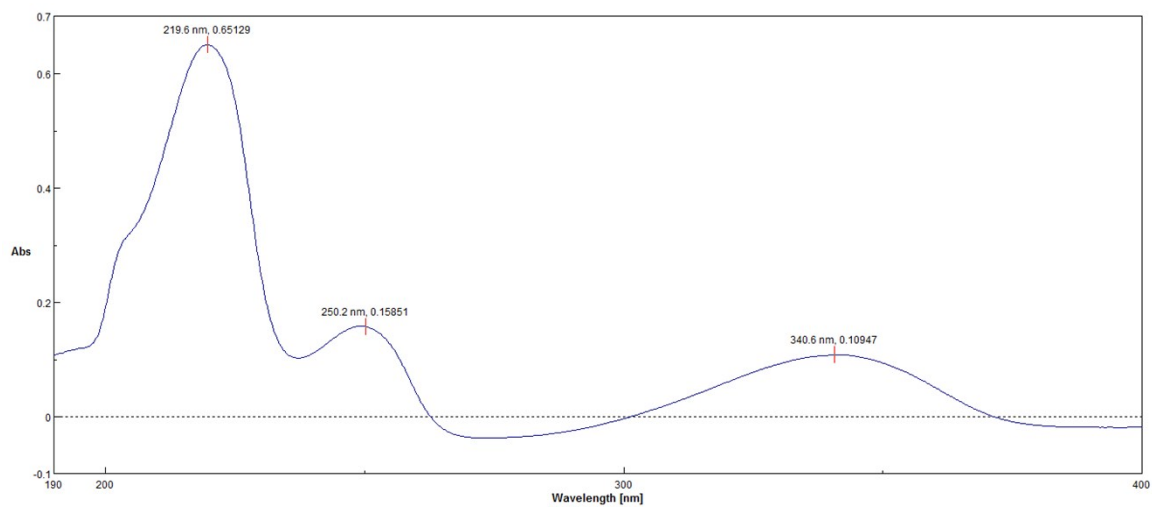

Figure S12. The UV of compound 2 in MeOH



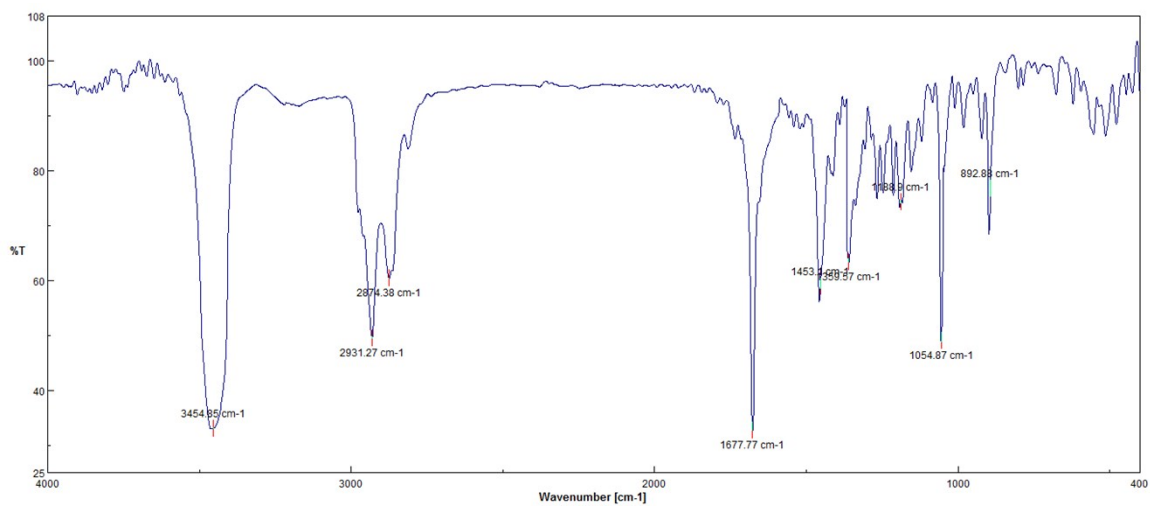

Figure S13. The IR (KBr disc) of compound 2

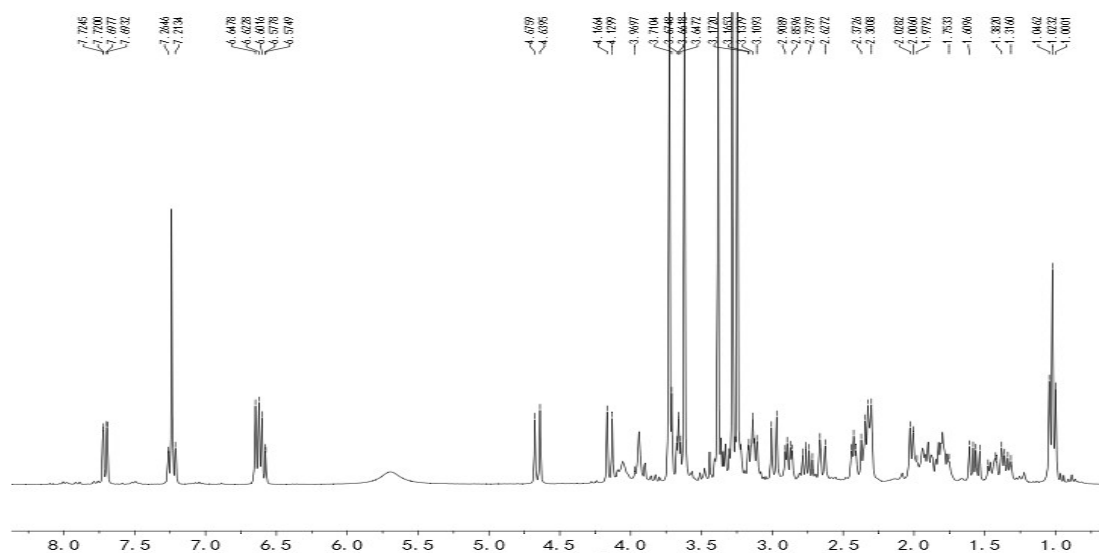

Figure S14. The <sup>1</sup>H NMR spectrum of compound 2 in CDCl<sub>3</sub>

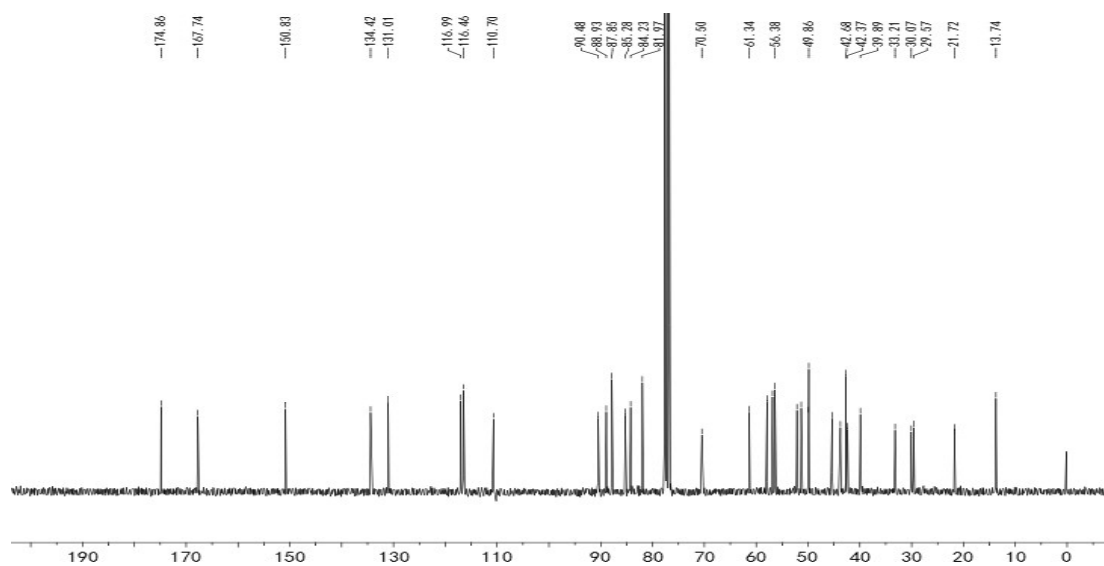

Figure S15. The  $^{13}\text{C}$  NMR spectrum of compound 2 in  $\text{CDCl}_3$

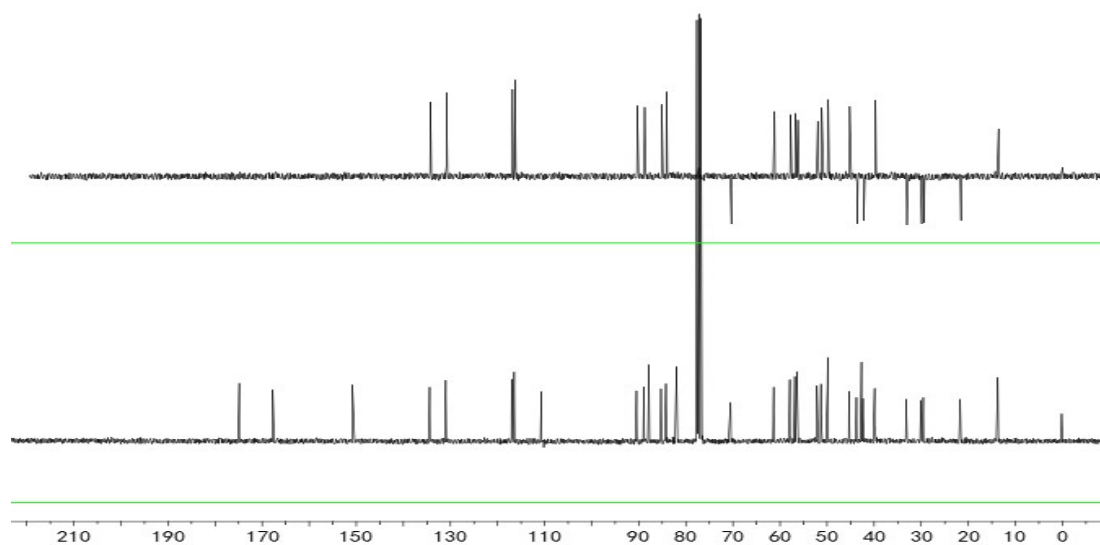

Figure S16. The DEPT-135 NMR spectrum of compound 2 in  $\text{CDCl}_3$

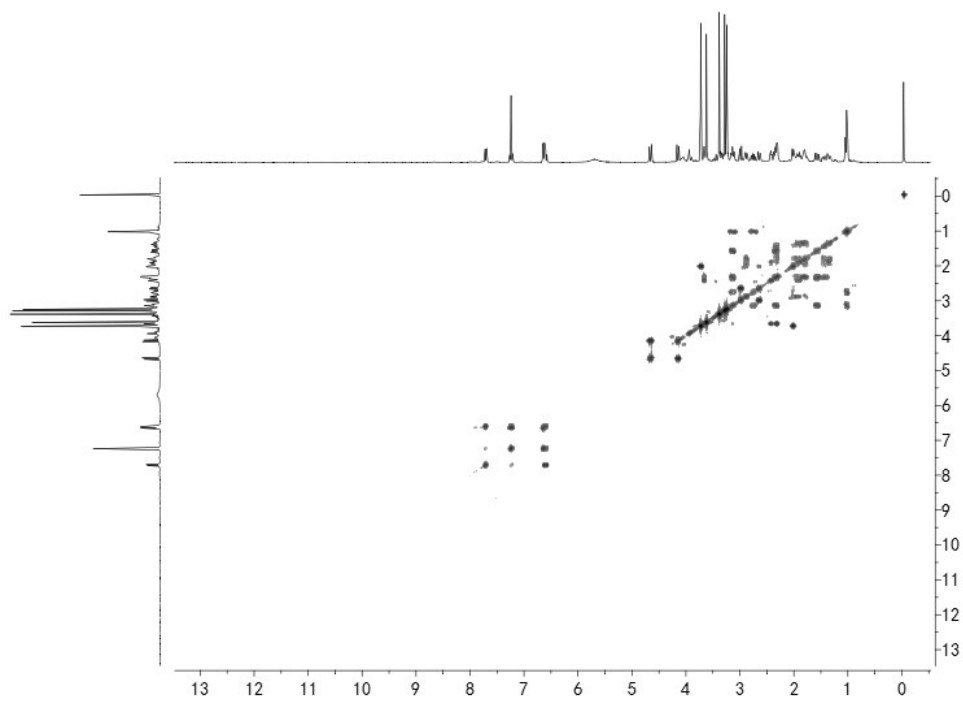

**Figure S17.** The  $^1\text{H}$ - $^1\text{H}$  COSY spectrum of compound 2 in  $\text{CDCl}_3$

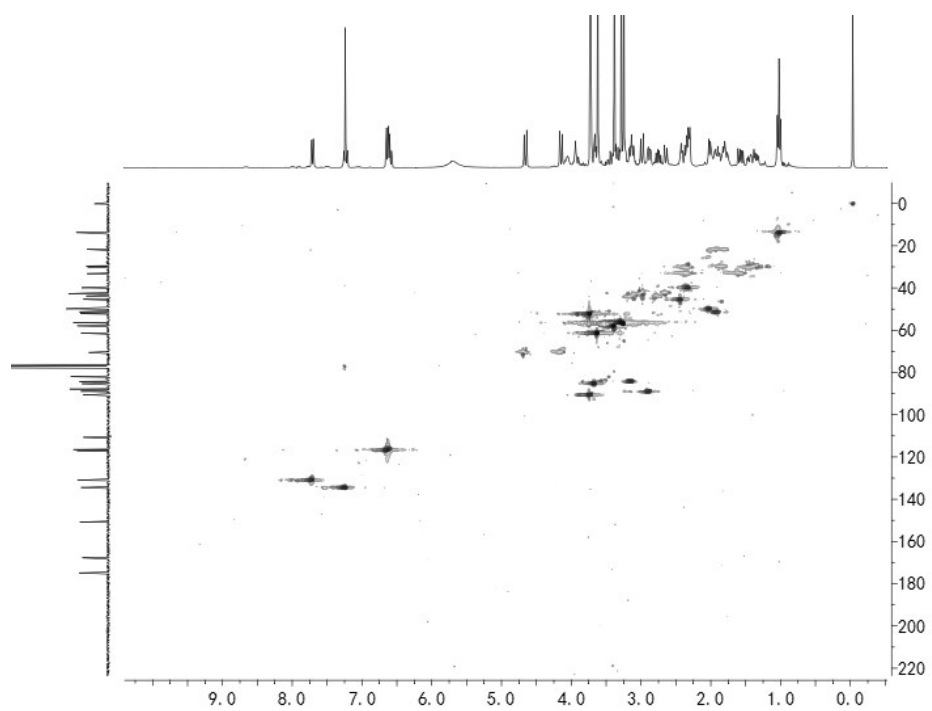

**Figure S18.** The HSQC NMR spectrum of compound 2 in  $\text{CDCl}_3$

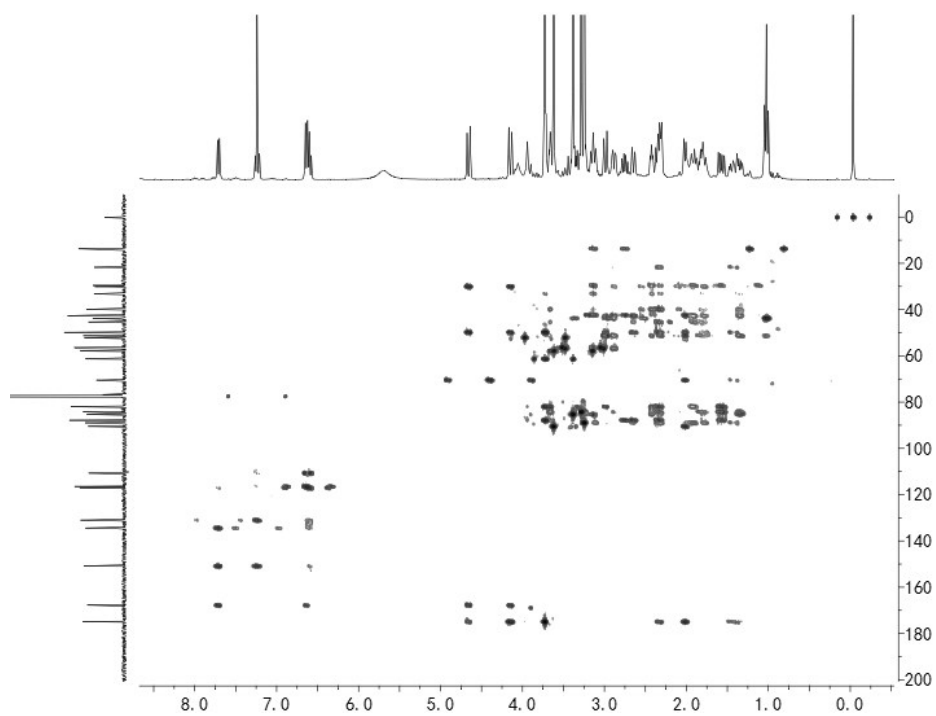

**Figure S19.** The HMBC spectrum of compound **2** in  $\text{CDCl}_3$

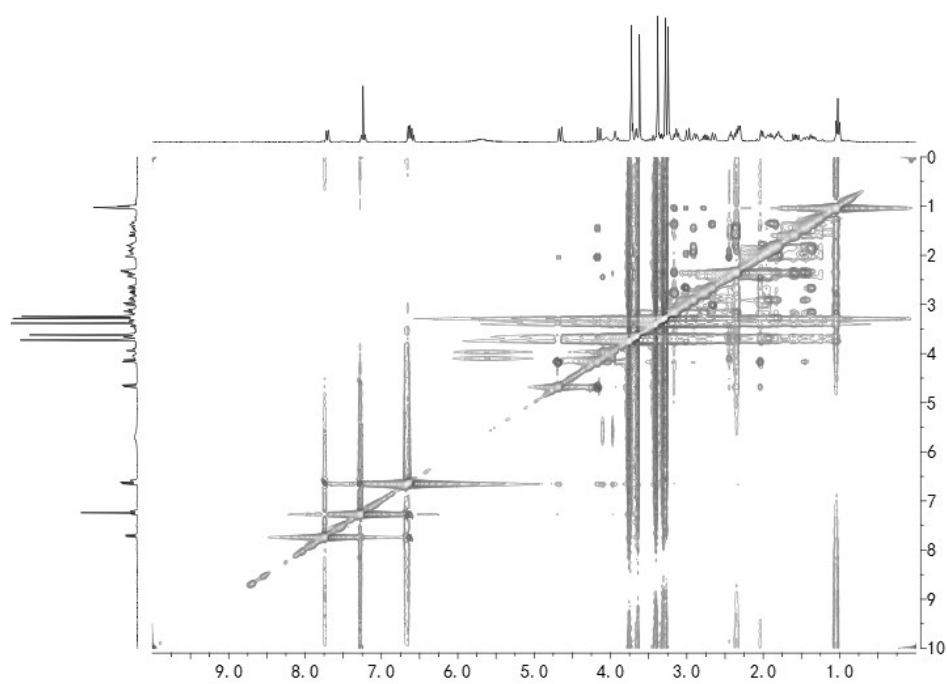

**Figure S20.** The NOESY spectrum of compound **2** in  $\text{CDCl}_3$
